# Supplementary material for: Smartphone Users’ Persuasion Knowledge in the Context of Consumer mHealth Apps: Qualitative Study
Source: PubMed Central journal article supplement (PMC8080138; doi:10.2196/16518), 2021-04-13
Supplement: mhealth_v9i4e16518_app2.pdf [file mhealth_v9i4e16518_app2.pdf]

**Table S1.** Conceptual Definitions of Themes and Examples of Codes.

| <b>Research question</b>                                                                                                                                                                                                                                                                                                              | <b>Themes</b>                                                                                                                        | <b>Codes</b>                                                                                                                                                                                                                                                                                                                                                                                                                                                                                                                                                                                                 |
|---------------------------------------------------------------------------------------------------------------------------------------------------------------------------------------------------------------------------------------------------------------------------------------------------------------------------------------|--------------------------------------------------------------------------------------------------------------------------------------|--------------------------------------------------------------------------------------------------------------------------------------------------------------------------------------------------------------------------------------------------------------------------------------------------------------------------------------------------------------------------------------------------------------------------------------------------------------------------------------------------------------------------------------------------------------------------------------------------------------|
| RQ1: What are study participants' levels of awareness of and interest in knowing an mHealth app affiliation with a supporting organization?                                                                                                                                                                                           | Recognition of mHealth app source is secondary to app's health management functions                                                  | Promotional support is not recognized; Promotional support doesn't matter (n = 30) <sup>a</sup>                                                                                                                                                                                                                                                                                                                                                                                                                                                                                                              |
| RQ2: What are the differences in the nature of participants' persuasion knowledge (e.g., recognition of target and agent, understanding of agent's characteristics and capacities, self-promotion and public service purposes,) across commercial, governmental, non-profit/non-governmental organizations that support mHealth apps? | From commercial entertainment to non-commercial information<br><br>Self-promotion and public service motivations behind mHealth apps | <b>Commercial Organizations:</b><br>Promote products or brands; Build brand image; Sell products; CSR (Corporate Social Responsibility); Misinformation (biased or false information); Record data (personal information, app use data, consumer opinions) (n = 68)<br><br><b>Non-profit Organizations:</b><br>Help people (not-for-profit); Want support groups/fundraising; Provide Information; Collect data (n = 50)<br><br><b>Government Organizations:</b><br>Mostly same as non-profit organizations; Help people (public health); Provide information; Want to collect information; Control (n = 39) |
| RQ3: In what ways do participants' evaluations of mHealth apps' quality and credibility differ by the type of supporting mHealth app organization?                                                                                                                                                                                    | Quality does not mean credibility                                                                                                    | <b>Commercial Organizations:</b><br>Low credibility; Low likability; Great quality (best for quality); Fun/Entertainment (n = 41)<br><br><b>Non-profit Organizations:</b><br>High credibility; High likability; But, low OR mediocre quality; Specificity of topic (n = 40)<br><br><b>Government Organizations:</b><br>High credibility; Medium likability (less popular or boring or not user friendly); High informativeness; Broad information on various topics; Low quality (n = 45)                                                                                                                    |

**All Organization Types:**  
Money matters (for quality);  
supporting organization doesn't  
matter if an app is useful or good  
for me (n = 15)

RQ4: What are the differences  
in coping mechanisms, if any,  
that participants implement  
when they are informed about  
mHealth app support by  
commercial, governmental,  
non-profit/non-governmental  
organizations, especially in  
light of sharing personal  
information within such apps?

Trade-offs

It is culture. It is  
normal.  
Defenses against  
mHealth persuasion  
attempts

**Willing to share:**  
Social media information is not  
perceived as personal (already  
public info); Convenient to use;  
Forced to share (app use culture –  
if need, will provide BUT will  
worry as well); Share alternative  
person info such as secondary  
email (or Fake info –ex. Fake  
name); Basic/general personal  
info + health info [but depending  
on how much info want to share];  
Relevant info (health + general) +  
but consider as SCAM, if they ask  
some financial information; Better  
to share less than more (n = 61)

In general, will provide more  
information to non-profits than  
commercial organizations, worried  
about sharing info with  
commercial entities (n = 15)

Only relevant info to all  
supporting organizations (n = 41)

Purpose of app (purpose of  
organization) – Organization-  
cause congruency (ex.  
Commercial cause matter, Non-  
profit/government cause match) (n  
= 9)

**Not willing to share:**  
Security risk; Privacy matter/  
control personal info; Ads/ junk  
mails; Misuse of personal info; No  
share personal or health info if  
linked to identified personal info  
(n = 84)

Note: a. number of code instances
