# Supplementary material for: Smartphone Users’ Persuasion Knowledge in the Context of Consumer mHealth Apps: Qualitative Study
Source: PubMed Central journal article supplement (PMC8080138; doi:10.2196/16518), 2021-04-13
Supplement: mhealth_v9i4e16518_app3.pdf [file mhealth_v9i4e16518_app3.pdf]

**Table S2.** Participant demographics.

|                           | <b>Gender</b>         | <b>Age</b> | <b>Race</b> | <b>Education</b> |
|---------------------------|-----------------------|------------|-------------|------------------|
| <b>Total</b>              | 25                    |            |             |                  |
| Female                    | 16 (64%) <sup>a</sup> |            |             |                  |
| Male                      | 8 (32%)               |            |             |                  |
| Refused to answer         | 1 (4%)                |            |             |                  |
| 18-24                     |                       | 5 (20%)    |             |                  |
| 25-34                     |                       | 10 (40%)   |             |                  |
| 35-44                     |                       | 2 (8%)     |             |                  |
| 45-54                     |                       | 3 (12%)    |             |                  |
| 55-64                     |                       | 2 (8%)     |             |                  |
| 65 and over               |                       | 2 (8%)     |             |                  |
| Refused to answer         |                       | 1 (4%)     |             |                  |
| Caucasian                 |                       |            | 12 (48%)    |                  |
| Asian or Pacific Islander |                       |            | 5 (20%)     |                  |
| African American          |                       |            | 4 (16%)     |                  |
| Other                     |                       |            | 3 (12%)     |                  |
| Refused to answer         |                       |            | 1 (4%)      |                  |
| Some college              |                       |            |             | 4 (16%)          |
| Associate's degree        |                       |            |             | 1 (4%)           |
| Bachelor's degree         |                       |            |             | 7 (28%)          |
| Master's degree           |                       |            |             | 4 (6%)           |
| Doctorate degree          |                       |            |             | 1 (4%)           |
| Other                     |                       |            |             | 1 (4%)           |
| Refused to answer         |                       |            |             | 7 (28%)          |

Note: a. Participants, n (%)
